# Supplementary material for: Activation of Immune System May Cause Pathophysiological Changes in the Myocardium of SARS-CoV-2 Infected Monkey Model
Source: MDPI journal article supplement (doi:10.3390/cells11040611), 2022-02-10
Supplement: s1 [file s1]

# Supplementary Material

**Table S1.** Animal route of infection, dosage, demographic information, and time of necropsy.

| No. | Animal | Infection Route | Dose         | Age  | Sex | Necropsy (DPI) |
|-----|--------|-----------------|--------------|------|-----|----------------|
| 1   | RM1    | Multi-route     | 3.61e+06 PFU | 14   | M   | 27             |
| 2   | RM2    | Multi-route     | 3.61e+06 PFU | 13   | F   | 27             |
| 3   | AGM 2  | Multi-route     | 3.61e+06 PFU | 16   | F   | 22 (ARDS)      |
| 4   | AGM 3  | Multi-route     | 3.61e+06 PFU | 16   | M   | 26             |
| 5   | RM3    | Aerosol         | 1.0e+04 PFU  | 13   | M   | 28             |
| 6   | RM4    | Aerosol         | 1.0e+04 PFU  | 15   | M   | 28             |
| 7   | AGM 1  | Aerosol         | 1.0e+04 PFU  | 16   | F   | 8 (ARDS)       |
| 8   | AGM 4  | Aerosol         | 1.0e+04 PFU  | 16   | M   | 24             |
| 9   | CTRL1  | -               | -            | 3    | F   |                |
| 10  | CTRL2  | -               | -            | 3    | F   |                |
| 11  | CTRL3  | -               | -            | 3    | F   |                |
| 12  | CTRL4  | -               | -            | 5.39 | F   |                |
| 13  | CTRL5  | -               | -            | 6    | M   |                |
| 14  | CTRL6  | -               | -            | 10   | F   |                |
| 15  | CTRL7  | -               | -            | 10   | M   |                |
| 16  | CTRL8  | -               | -            | 7    | F   |                |
